# Supplementary material for: Satellite Fe3O4@SiO2–Au SERS probe for trace Hg2+ detection
Source: Royal Society of Chemistry journal article supplement (doi:10.1039/c6ra15044f), 2016-01-01
Supplement: c6ra15044f1.pdf [file c6ra15044f1.pdf]

## Supporting Information

### Satellite $\text{Fe}_3\text{O}_4@\text{SiO}_2$ -Au SERS probe for trace $\text{Hg}^{2+}$ detection

Zhenli Sun, Jingjing Du, Bo Lv and Chuanyong Jing\*

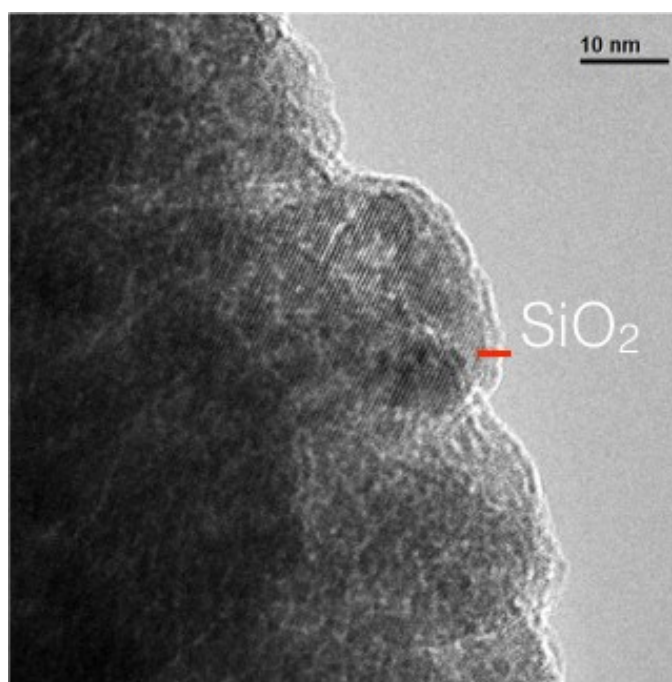

**Figure S1.** HR-TEM image of  $\text{Fe}_3\text{O}_4@\text{SiO}_2$  microsphere.

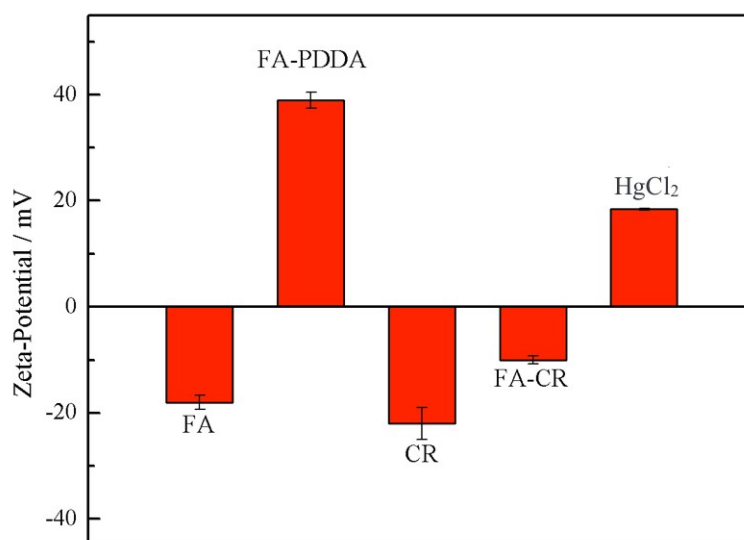

**Figure S2.** Zeta-potentials during FA functionalization.

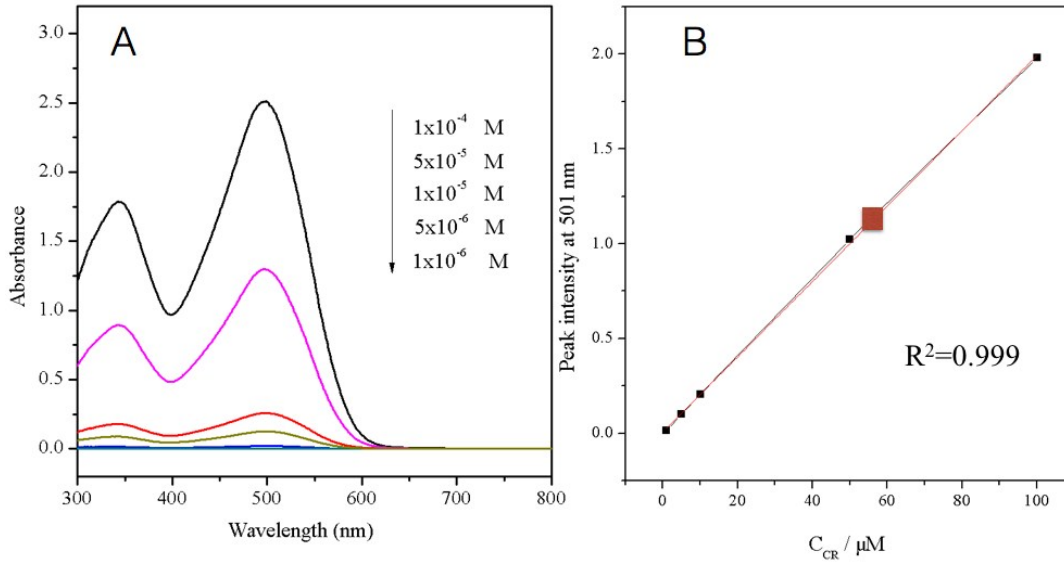

**Figure S3.** (A) UV-vis spectra of CR. (B) The calibration curve of CR from 0 to 100  $\mu\text{M}$ . The inset red point was CR concentration after FA functionalization.

**Determination of maximum CR molecule density on the FA surface**

**(a) CR molecule on each FA microsphere**

According to UV-vis experiment (Figure S5), the amount of CR molecular functionalized on 1 mL FA substrate was

$$N_{CR1} = C_{CR} \times V_{CR}$$

$$\approx (100 - 63.3) \times 1 \times 10^{-6} \times 6.02 \times 10^{23} \times 10^{-3}$$

$$\approx 2.21 \times 10^{16}$$

There are 1mg  $\text{Fe}_3\text{O}_4$  in 1 mL FA substrate, the amount of  $\text{Fe}_3\text{O}_4$  was

$$N_{\text{Fe}_3\text{O}_4} \approx \frac{m_{\text{Fe}_3\text{O}_4 1}}{m_{\text{Fe}_3\text{O}_4 2}}$$

$$= \frac{1}{\frac{4}{3}\pi \times 155 \times R_{Fe_3O_4}^3 \times \rho_{Fe_3O_4}}$$

$$= \frac{1}{\frac{4}{3}\pi \times 155^3 \times 5.14 \times 10^{-18}}$$

$$\approx 1.25 \times 10^{10}$$

The amount of CR molecule functionalized on each FA sphere was

$$N_{CR2} = \frac{N_{CR1}}{N_{Fe_3O_4}}$$

$$\approx 1.77 \times 10^6$$

**(b) Surface area of each FA microsphere**

$$N_{Au} \approx \frac{4\pi}{\Phi}$$

$$\approx \frac{4 \times \pi \left( R + r + \frac{gap}{2} \right)^2}{\pi \left( r + \frac{gap}{2} \right)^2}$$

$$= \frac{4 \times (115 + 10 + 3.5)^2}{(10 + 3.5)^2}$$

$$\approx 362$$

$$S_{FA} = S_{Fe_3O_4} + N_{Au} S_{Au}$$

$$= 4\pi R^2 + 362 \times 4\pi r^2$$

$$\approx 756939$$

Where  $\phi$  represents the deflection angle, Gap is distance between Au NPs, R is the radii of the  $\text{Fe}_3\text{O}_4$  NP, r is the radii of the Au NP (Figure S6). Here, Gap, R and r are experimentally determined as Gap=7 nm, R=115 nm and r =10 nm. Based on these parameters, we obtained that the amount of Au NPs bound to an  $\text{Fe}_3\text{O}_4$  sphere is about 362. Then surface area of each FA microsphere is about 756939.

**(c) CR density on FA surface**

$$D_{CR} = \frac{N_{CR2}}{S_{FA}}$$

$$\approx \frac{1.77 \times 10^6}{7.57 \times 10^5}$$

$$\approx 2.34$$

The CR molecule density functionalized on each FA sphere can be estimated to be about 2.34 per  $\text{nm}^2$ .

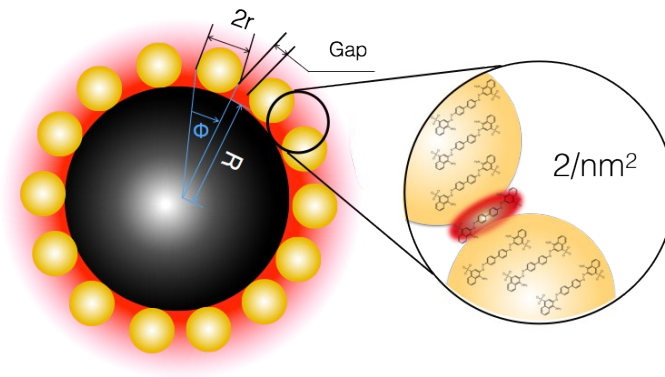

**Figure S4.** Estimation of the CR density on FA surface.

**Table S1** EDS for sample FA-CR before  $\text{Hg}^{2+}$  adsorption

| Elt. | Line | Intensity (c/s) | Atomic % | Conc   | Units | MDL3-sig |
|------|------|-----------------|----------|--------|-------|----------|
| Si   | Ka   | 76.56           | 14.381   | 4.75   | wt.%  | 0.237    |
| Fe   | La   | 77.84           | 62.134   | 40.82  | wt.%  | 1.268    |
| Au   | La   | 153.97          | 23.231   | 53.83  | wt.%  | .995     |
| Hg   | La   | 1.54            | 0.255    | 0.60   | wt.%  | 1.111    |
|      |      |                 | 100.000  | 100.00 | wt.%  | Total    |

**Table S2** EDS for sample FA-CR after Hg<sup>2+</sup> adsorption

| Elt. | Line | Intensity (c/s) | Atomic % | Conc   | Units | MDL 3-sig |
|------|------|-----------------|----------|--------|-------|-----------|
| Si   | Ka   | 88.62           | 13.887   | 4.45   | wt.%  | 0.222     |
| Fe   | La   | 89.49           | 60.890   | 38.80  | wt.%  | 1.471     |
| Au   | La   | 187.18          | 23.653   | 53.16  | wt.%  | 0.806     |
| Hg   | La   | 11.33           | 1.571    | 3.59   | wt.%  | 0.877     |
|      |      |                 | 100.000  | 100.00 | wt.%  | Total     |

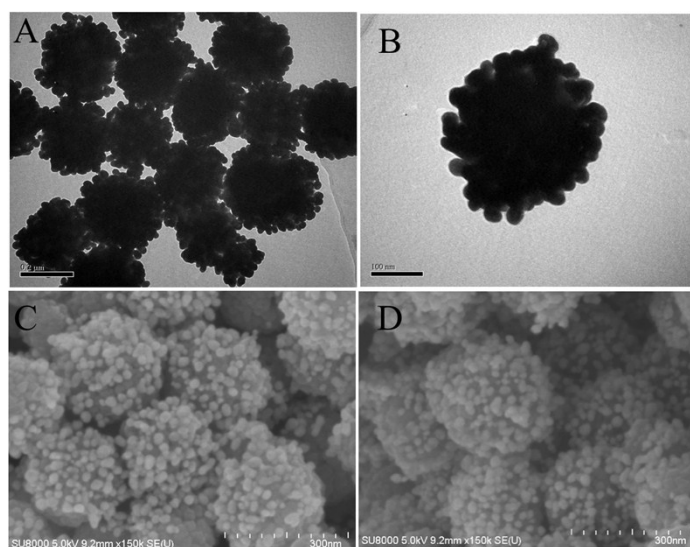

**Figure S5.** TEM and SEM images of FA-CR before (A, C) and after (B, D) Hg<sup>2+</sup> adsorption.

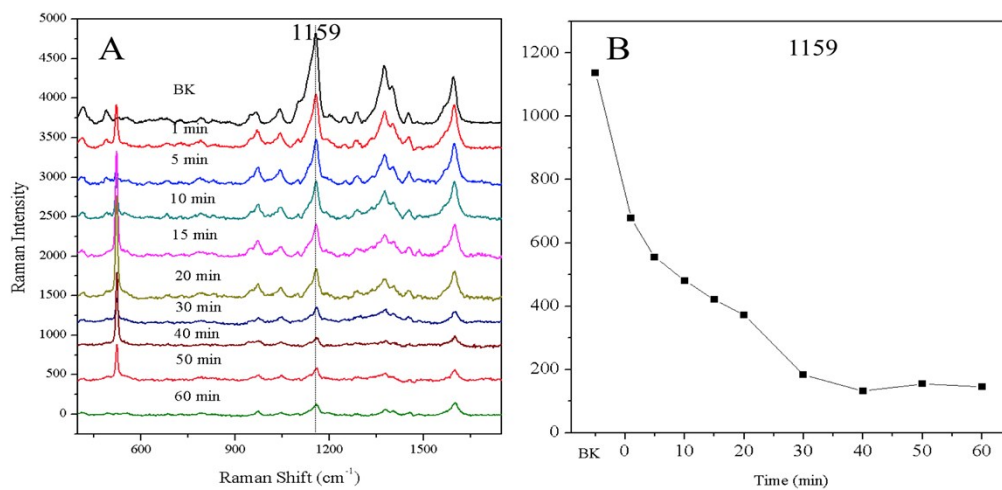

**Figure S6.** SERS spectra (A) and peak intensity at  $1159 \text{ cm}^{-1}$  (B) of FA-CR with  $1 \times 10^{-5}$  M  $\text{Hg}^{2+}$  mixing time from 1 min to 60 min. Signal collection time was 1 s.

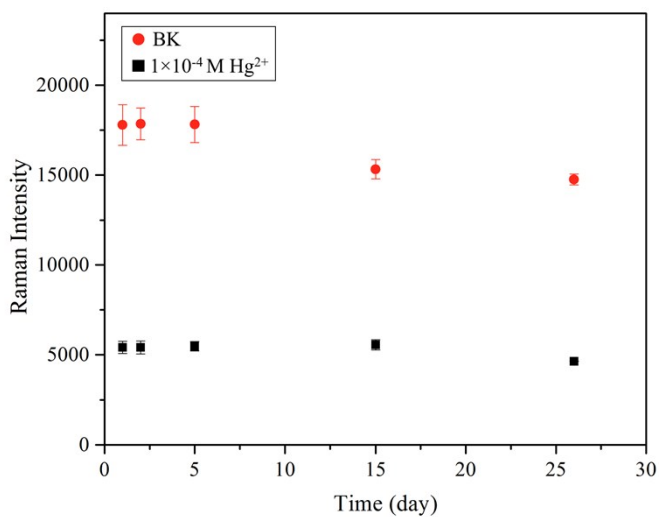

**Figure S7.** Peak intensity at  $1159 \text{ cm}^{-1}$  of FA-CR BK and FA-CR with  $1 \times 10^{-5}$  M  $\text{Hg}^{2+}$ . Signal collection time was 5 s.
